# Supplementary material for: Surface etching and edge control of hexagonal boron nitride assisted by triangular Sn nanoplates
Source: Royal Society of Chemistry journal article supplement (doi:10.1039/d2na00479h), 2022-01-01
Supplement: d2na00479h1.pdf [file d2na00479h1.pdf]

## Supplementary Information

### Surface etching and edge control of hexagonal boron nitride assisted by triangular Sn nanoplates

Hsin Yi,<sup>a</sup> Pablo Solís-Fernández,<sup>b</sup> Hiroki Hibino<sup>c</sup> and Hiroki Ago<sup>\*a,b</sup>

<sup>a</sup> *Interdisciplinary Graduate School of Engineering Sciences, Kyushu University, Fukuoka 816-8580, Japan*

<sup>b</sup> *Global Innovation Center (GIC), Kyushu University, Fukuoka 816-8580, Japan*

<sup>c</sup> *School of Engineering, Kwansei Gakuin University, Hyogo 669-1330, Japan*

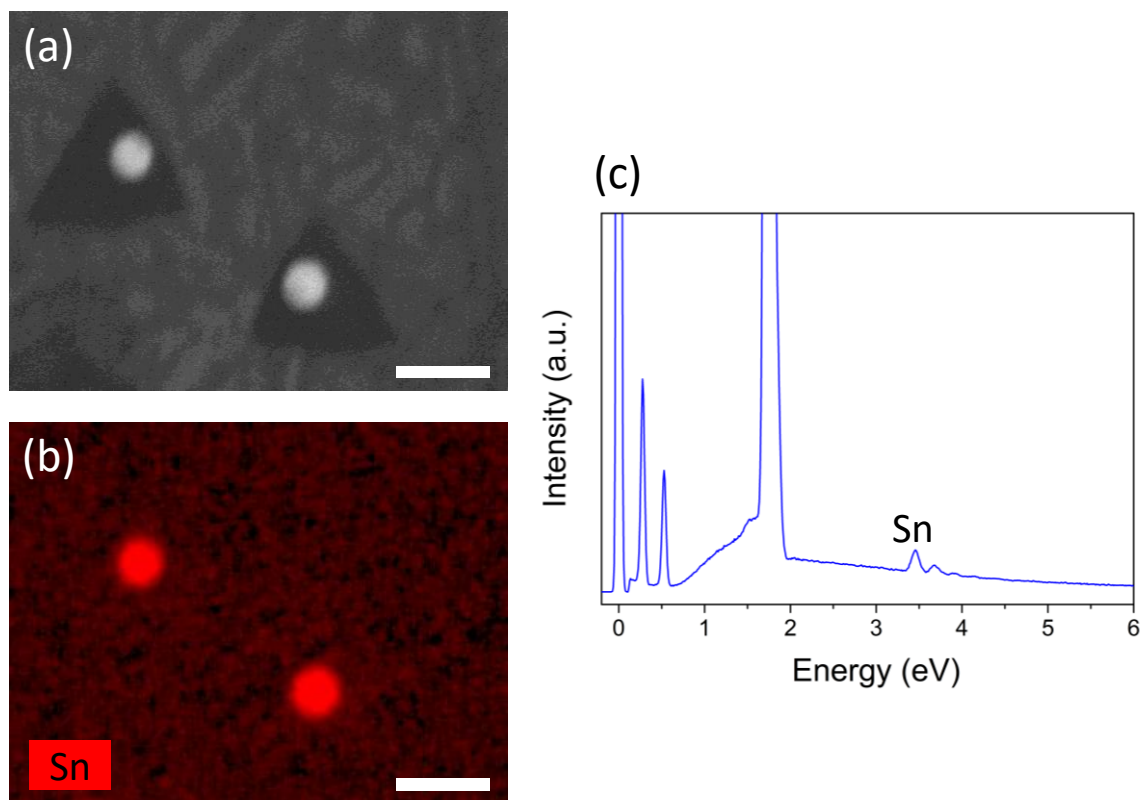

**Figure S1.** SEM (a) and EDS (b) images showing the deposited Sn particles. (c) EDS data collected from the whole area in (b). The scale bars are 500 nm.

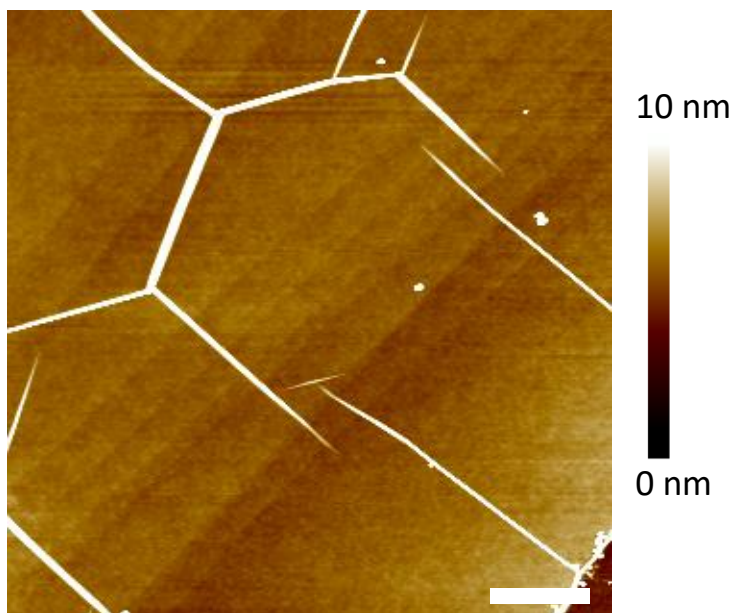

**Figure S2.** AFM image of a multilayer hBN after the annealing at 1000 °C in Ar for 30 min without Sn powder at the upstream. The scale bar is 1  $\mu\text{m}$ .

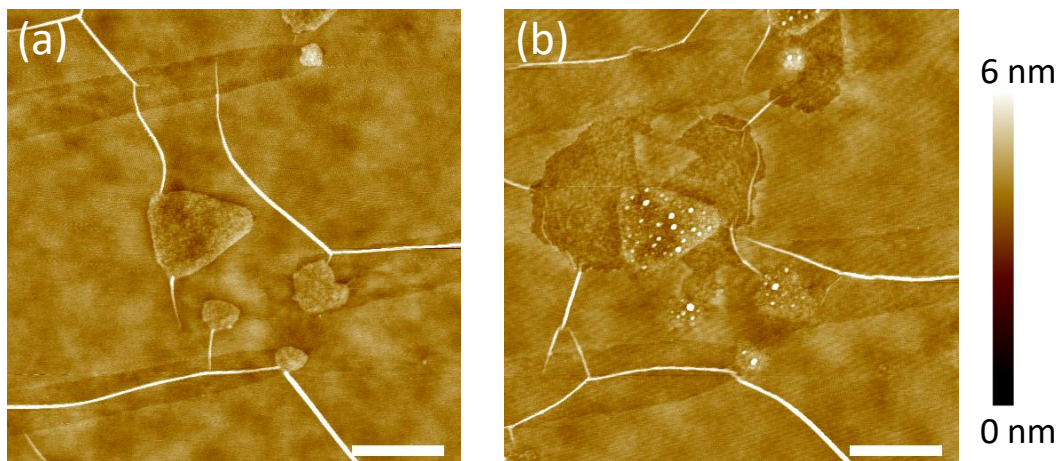

**Figure S3.** AFM images of the nanoplates before (a) and after (b) annealing of the Sn/hBN sample at 1000 °C in Ar for 10 min without supplying additional Sn vapor. The scale bars are 200 nm.

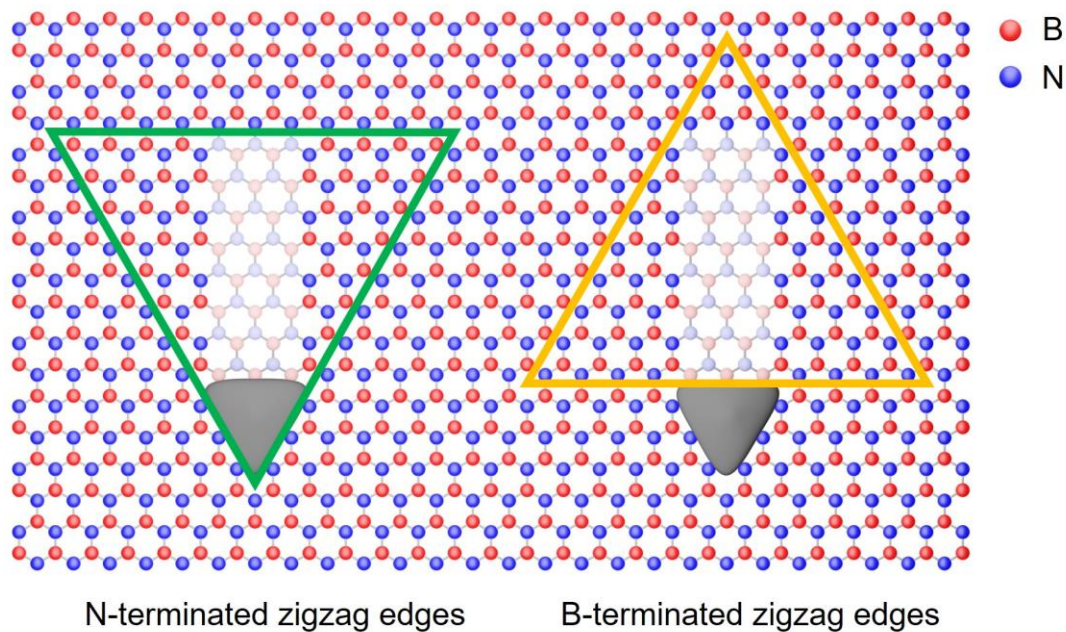

**Figure S4.** Two possible directions expected for the Sn-free etching. Due to the higher stability of N-terminated zigzag edges, the Sn-free etching will follow the directions indicated by the green lines.
